# Supplementary material for: Leaf Litter Breakdown and Soil Microbes in Catalpa bungei Plantations in Response to Various Fertilization Regimes
Source: MDPI journal article supplement (doi:10.3390/f14040699), 2023-03-29
Supplement: s1 [file s1]

**Figure S1.** Plot diagrams and arrangement of litter plots.

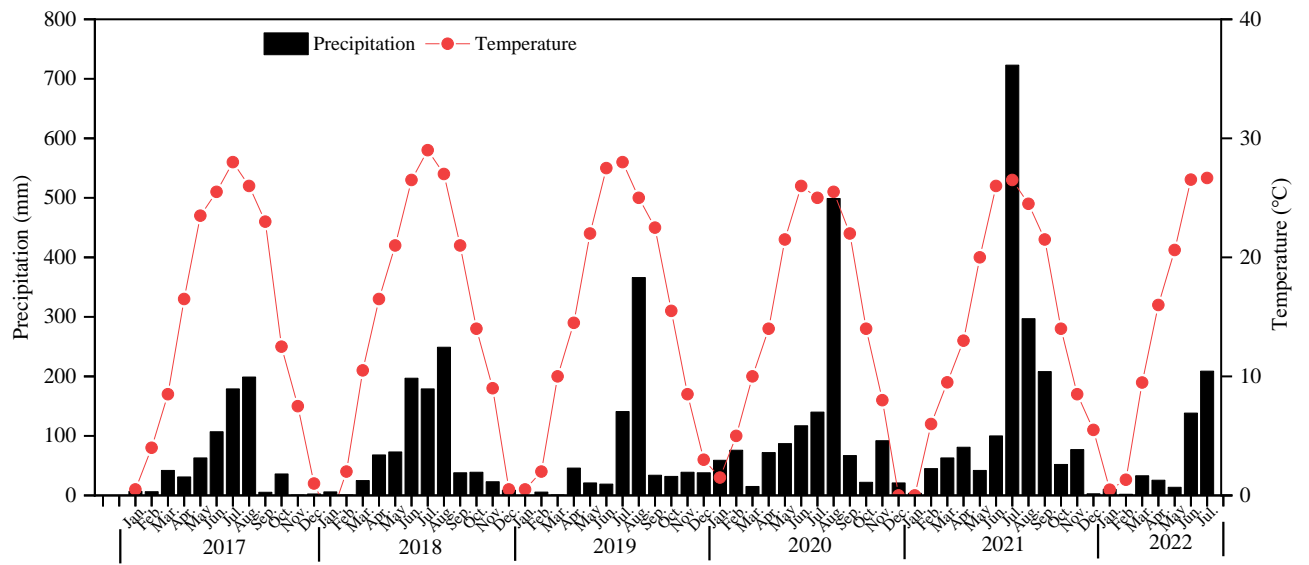

**Figure S2.** Temperature and precipitation from 2017 to 2022 in Zhangqiu District, Jinan City, China.

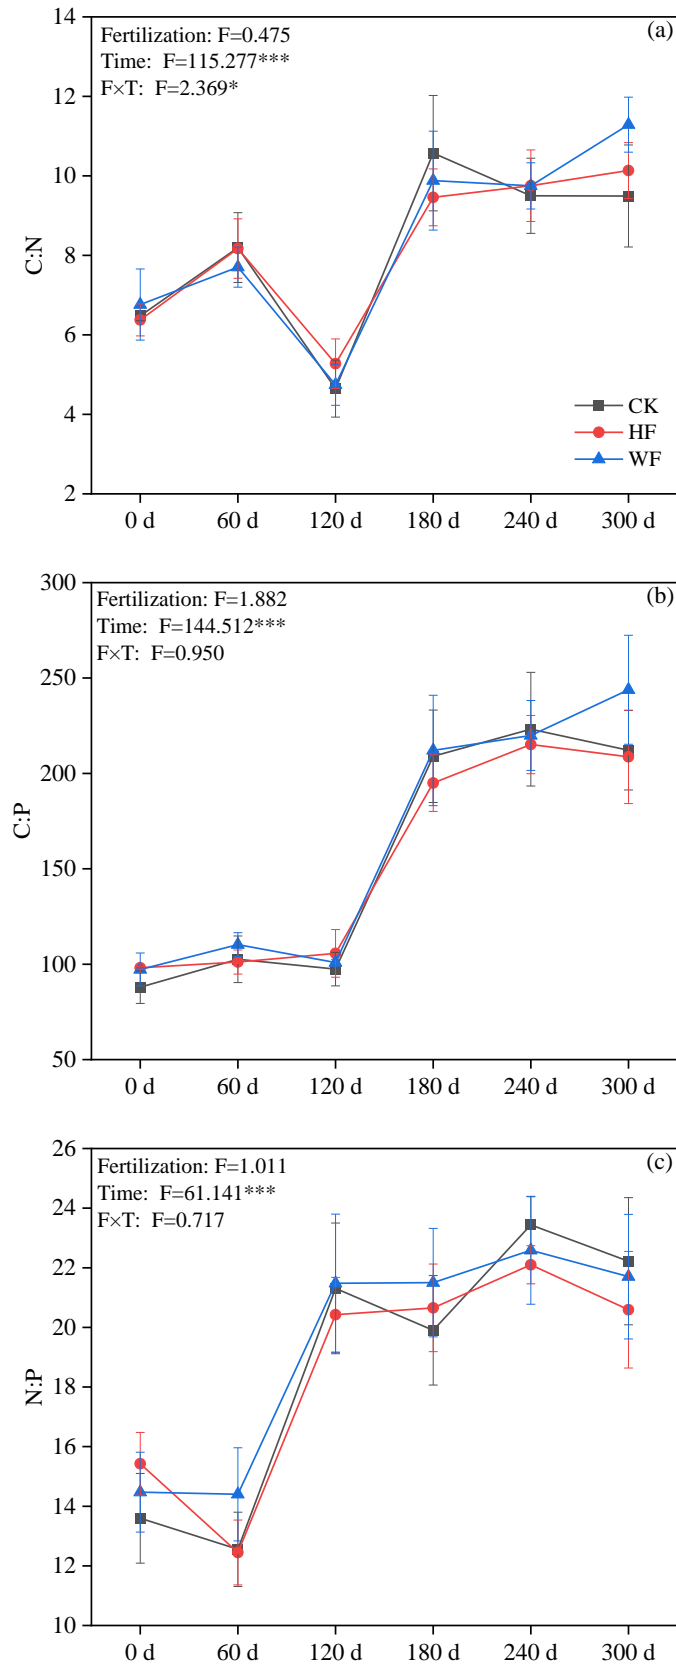

**Figure S3.** Stoichiometric ratios of the leaf litter treated through three fertilization regimes. a, C:N; b, C:P; c, N:P; CK, no fertilization; HF, hole fertilization; WF, integration of water and fertilizer. \*,  $P < 0.05$ ; \*\*,  $P < 0.01$ ; \*\*\*,  $P < 0.001$ .

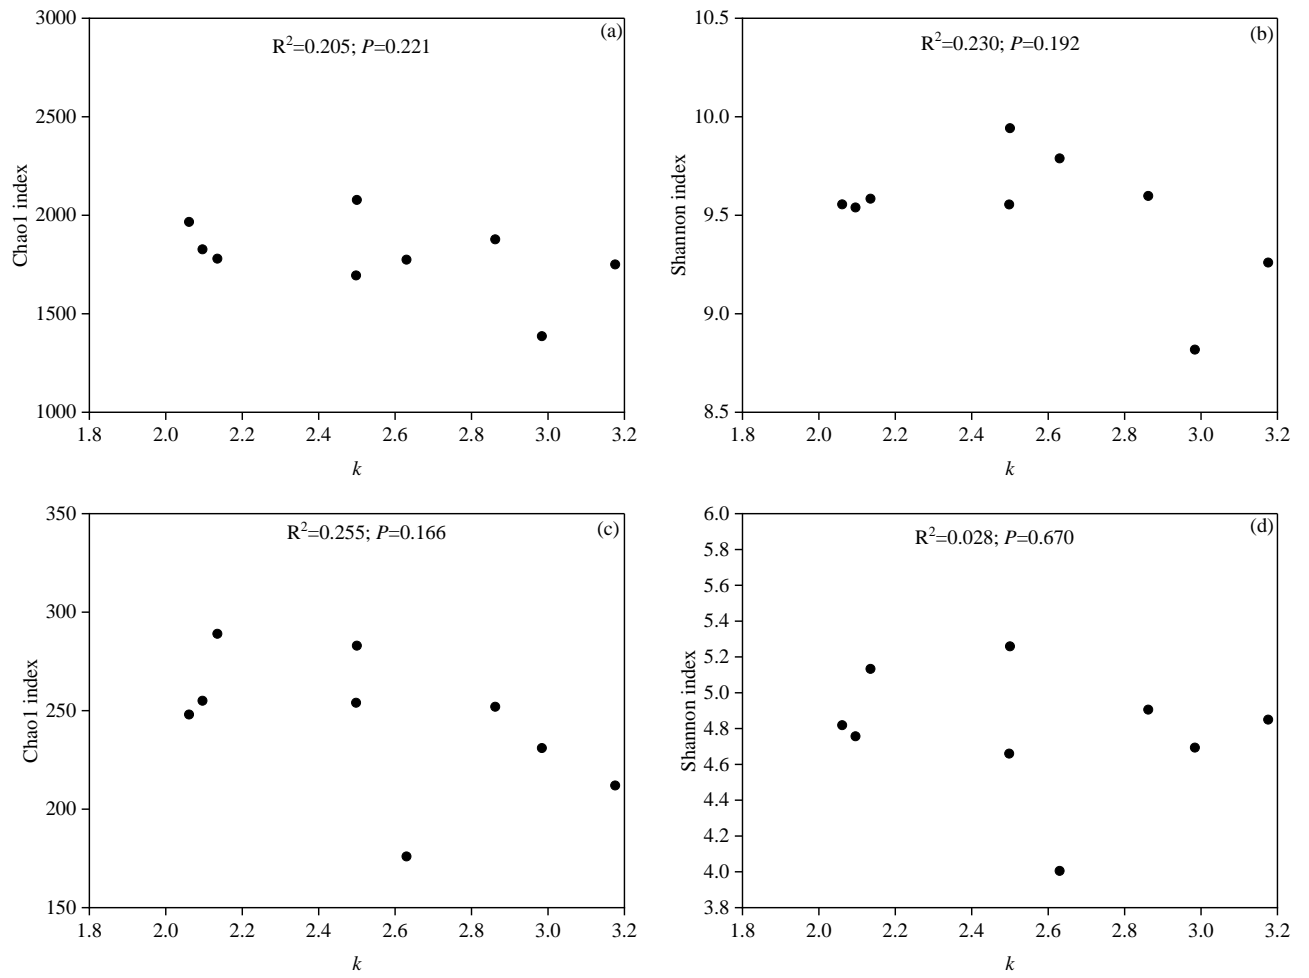

**Figure S4.** Linear fitting of bacterial (a–b) and fungal (c–d) diversity to decomposition constants.

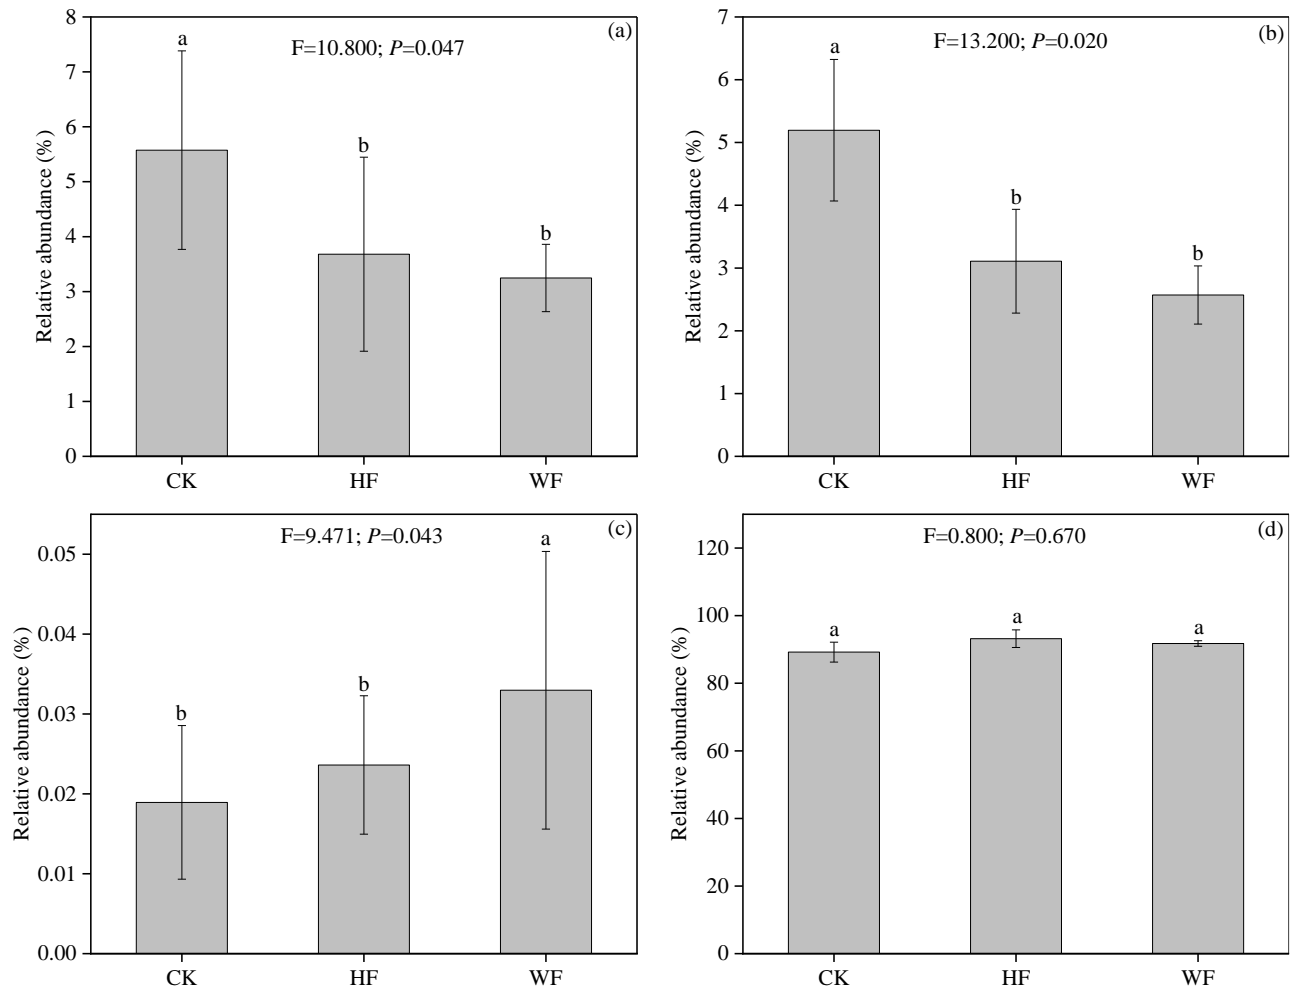

**Figure S5.** FUN-Guild analysis for predicting fungal functions in three fertilization regimes. a: pathotroph; b: saprotroph; c: symbiotroph; d: others. CK: no fertilization; HF: hole fertilization; WF: integration of water and fertilizer.

#### Supplementary Material—Tables

**Table S1.** Chemical properties of topsoil (0-20 cm) treated through three fertilization regimes.

| Soil properties | CK             | HF             | WF            | F     | P     |
|-----------------|----------------|----------------|---------------|-------|-------|
| pH              | 7.640±0.423    | 7.500±0.299    | 7.745±0.269   | 0.797 | 0.469 |
| SOM (g/kg)      | 16.916±2.343   | 18.312±2.481   | 16.266±1.093  | 1.533 | 0.248 |
| SOC (g/kg)      | 9.812±1.359    | 10.622±1.439   | 9.835±0.634   | 1.533 | 0.248 |
| TN (g/kg)       | 0.978±0.079    | 1.014±0.053    | 0.961±0.021   | 1.378 | 0.282 |
| TP (g/kg)       | 0.516±0.021    | 0.538±0.018    | 0.530±0.049   | 0.743 | 0.492 |
| TK (g/kg)       | 17.132±0.843   | 17.496±0.425   | 17.637±0.806  | 0.792 | 0.471 |
| AN (mg/kg)      | 61.380±7.130   | 59.392±1.388   | 57.404±2.944  | 1.158 | 0.341 |
| AP (mg/kg)      | 16.315±4.637   | 17.098±5.387   | 15.438±5.666  | 0.150 | 0.862 |
| AK (mg/kg)      | 180.129±13.503 | 193.418±23.135 | 175.032±4.707 | 2.193 | 0.146 |

Note: Mean±SD values are shown. SOM, soil organic matter; SOC, soil organic carbon; TN, total nitrogen; TP, total phosphorus; TK, total potassium; AN, alkaline hydrolyzed nitrogen; AP, available

phosphorus; AK, available potassium; CK, no fertilization; HF, hole fertilization; WF, integration of water and fertilizer; F and P value originated from the Kruskal–Wallis test.

**Table S2.** Total mass and carbon content of leaf litter in 2021.

| Fertilization | Total mass (kg) | Total C content (kg) |
|---------------|-----------------|----------------------|
| CK            | 2470.26±44.58 a | 1052.85±19.32 a      |
| HF            | 2842.81±34.11 a | 1224.87±21.66 a      |
| WF            | 2607.58±22.68 a | 1113.75±15.48 a      |

Note: Mean±SD values are shown. Different lowercase letters in each column indicate significant differences between fertilization regimes ( $P < 0.05$ , Tukey's HSD). CK, no fertilization; HF, hole fertilization; WF, integration of water and fertilizer.

**Table S3.** Decomposition constant ( $k$ ) and the duration for leaf litter to decompose by 50% ( $t_{50\%}$ ) or 95% ( $t_{95\%}$ ) in three fertilization regimes.

| Fertilization | $k$           | $t_{50\%}$ (a) | $t_{95\%}$ (a) |
|---------------|---------------|----------------|----------------|
| CK            | 3.007±0.158 a | 0.231±0.012 b  | 0.998±0.052 b  |
| HF            | 2.543±0.076 b | 0.273±0.008 ab | 1.179±0.034 ab |
| WF            | 2.097±0.037 c | 0.331±0.006 a  | 1.429±0.026 a  |

Note: Different lowercase letters in each column indicate significant differences between fertilization regimes ( $P < 0.05$ , Tukey's HSD). CK, no fertilization; HF, hole fertilization; WF, integration of water and fertilizer.

**Table S4.** Nutrient release rates of leaf litter in three fertilization regimes.

|                | CK             | HF              | WF               |
|----------------|----------------|-----------------|------------------|
| N release (%)  | 81.333±7.760 A | 79.401±7.877 B  | 73.134±9.218 C   |
| P release (%)  | 85.603±9.046 A | 81.508±11.361 B | 79.509±10.405 C  |
| K release (%)  | 90.499±8.034 A | 87.951±11.150 B | 86.529±12.320 C  |
| Ca release (%) | 38.756±9.053 A | 28.495±5.017 B  | 25.308±4.631 B   |
| Mg release (%) | 61.246±8.817 A | 55.684±9.048 B  | 57.759±13.885 AB |
| C release (%)  | 77.147±8.886 A | 73.864±8.468 B  | 67.831±8.000 C   |

Note: Different capital letters in the same row indicate significant differences between fertilization regimes ( $P < 0.05$ , Tukey's HSD). CK, no fertilization; HF, hole fertilization; WF, integration of water and fertilizer.

**Table S5.** Relative abundance at the phylum level of bacteria and fungi.

| Fertilization           | CK             | HF             | WF             |
|-------------------------|----------------|----------------|----------------|
| <b>Bacterial phylum</b> |                |                |                |
| Proteobacteria          | 40.612±6.609 a | 35.389±2.934 b | 31.636±1.565 b |
| Actinobacteria          | 28.027±6.978 a | 26.598±4.671 a | 28.158±4.385 a |
| Bacteroidetes           | 9.318±1.240 a  | 10.584±3.270 a | 11.756±2.102 a |
| Firmicutes              | 7.779±0.844 b  | 8.175±3.524 b  | 10.348±4.536 a |
| Acidobacteria           | 6.673±1.130 b  | 8.980±2.163 a  | 8.705±0.924 a  |
| Gemmatimonadetes        | 2.720±0.162 b  | 4.172±0.800 a  | 2.982±0.235 b  |
| Chloroflexi             | 1.673±0.698 a  | 1.959±0.729 a  | 1.655±0.250 a  |
| Verrucomicrobia         | 0.772±0.245 c  | 1.292±0.299 b  | 1.868±0.334 a  |

**Fungal phylum**

|                   |                |                |                |
|-------------------|----------------|----------------|----------------|
| Ascomycota        | 70.241±2.885 a | 68.282±3.588 a | 62.939±4.208 a |
| Mortierellomycota | 15.595±4.159 a | 17.304±1.292 a | 15.351±2.069 a |
| Basidiomycota     | 12.339±1.607 a | 11.409±3.217 a | 9.552±1.987 a  |
| Chytridiomycota   | 0.459±0.189 b  | 1.882±1.540 a  | 1.144±0.372 a  |

Note: Mean±SD values are shown (abundance ≥1%). Different lowercase letters in each row indicate significant differences between fertilization regimes ( $P < 0.05$ , Tukey's HSD). CK, no fertilization; HF, hole fertilization; WF, integration of water and fertilizer.

**Table S6.** Alpha diversity of bacteria and fungi in three fertilization regimes.

|                 | CK               | HF               | WF              | F     | P     |
|-----------------|------------------|------------------|-----------------|-------|-------|
| <b>Bacteria</b> |                  |                  |                 |       |       |
| OTU             | 1657±256         | 1836±198         | 1845±97         | 1.156 | 0.561 |
| Chao1           | 1671.495±255.029 | 1848.908±202.204 | 1857.631±96.981 | 1.422 | 0.491 |
| Shannon index   | 9.225±0.391      | 9.762±0.195      | 9.860±0.023     | 2.756 | 0.252 |
| Simpson's index | 0.991±0.002      | 0.996±0.001      | 0.997±0.002     | 5.067 | 0.079 |
| <b>Fungi</b>    |                  |                  |                 |       |       |
| OTU             | 232±12           | 238±32           | 264±13          | 2.222 | 0.329 |
| Chao1           | 231.667±11.552   | 237.667±31.950   | 264.000±12.662  | 2.222 | 0.329 |
| Shannon index   | 4.816±0.110      | 4.841±0.627      | 4.903±0.202     | 0.622 | 0.733 |
| Simpson's index | 0.919±0.004      | 0.929±0.037      | 0.939±0.010     | 1.067 | 0.587 |

Note: Mean±SD values are shown. CK, no fertilization; HF, hole fertilization; WF, integration of water and fertilizer. F and P values determined through Kruskal–Wallis test.

**Table S7.** The results of envfit function of R package indicated correlations between all parameters and microbial communities (genus level).

| Parameters | Bacteria       |              | Fungi          |              |
|------------|----------------|--------------|----------------|--------------|
|            | R <sup>2</sup> | P            | R <sup>2</sup> | P            |
| pH         | 0.568          | <b>0.007</b> | 0.276          | 0.423        |
| SOM        | 0.548          | <b>0.038</b> | 0.231          | 0.496        |
| SOC        | 0.548          | <b>0.038</b> | 0.232          | 0.496        |
| TN         | 0.544          | <b>0.044</b> | 0.507          | <b>0.040</b> |
| TP         | 0.332          | 0.380        | 0.510          | <b>0.035</b> |
| TK         | 0.401          | 0.270        | 0.077          | 0.752        |
| AN         | 0.328          | 0.386        | 0.513          | <b>0.031</b> |
| AP         | 0.032          | 0.853        | 0.531          | <b>0.002</b> |
| AK         | 0.120          | 0.714        | 0.179          | 0.583        |
| N (L)      | 0.549          | <b>0.036</b> | 0.195          | 0.557        |
| P (L)      | 0.547          | <b>0.040</b> | 0.185          | 0.573        |
| K (L)      | 0.012          | 0.885        | 0.512          | <b>0.032</b> |
| Ca (L)     | 0.061          | 0.808        | 0.522          | <b>0.016</b> |
| Mg (L)     | 0.552          | <b>0.032</b> | 0.271          | 0.430        |
| OC (L)     | 0.560          | <b>0.019</b> | 0.506          | <b>0.042</b> |
| C:N (L)    | 0.319          | 0.400        | 0.288          | 0.403        |
| C:P (L)    | 0.563          | <b>0.014</b> | 0.324          | 0.343        |
| N:P (L)    | 0.568          | <b>0.006</b> | 0.299          | 0.384        |

Note: The bold numbers in the table indicate significant effects ( $P < 0.05$ ). SOM—Soil organic matter; SOC—Soil organic carbon; TN—Total nitrogen; TP—Total phosphorus; TK—Total potassium; AN—

Alkaline hydrolyzed nitrogen; AP—Available phosphorus; AK—Available potassium; N(L)—N content of leaf litter; P(L)—P content of leaf litter; K(L)—K content of leaf litter; Ca(L)—Ca content of leaf litter; Mg(L)—Mg content of leaf litter; OC(L)—organic carbon content of leaf litter; C:N(L)—C:N ratio of leaf litter; C:P(L)—C:P ratio of leaf litter; N:P(L)—N:P ratio of leaf litter.

**Table S8.** Number of lines in network analysis for bacteria and fungi.

| Fertilization | Bacteria               |                         |           |       | Fungi                  |                         |           |       |
|---------------|------------------------|-------------------------|-----------|-------|------------------------|-------------------------|-----------|-------|
|               | Collaborate (positive) | Antagonistic (negative) | C:A ratio | Total | Collaborate (positive) | Antagonistic (negative) | C:A ratio | Total |
| CK            | 216                    | 234                     | 0.92      | 450   | 218                    | 232                     | 0.94      | 450   |
| HF            | 168                    | 282                     | 0.60      | 450   | 196                    | 254                     | 0.77      | 450   |
| WF            | 166                    | 284                     | 0.58      | 450   | 188                    | 240                     | 0.78      | 428   |

Note: CK, no fertilization; HF, hole fertilization; WF, integration of water and fertilizer; C:A ratio, Collaborate:Antagonistic.

**Table S9.** Relative abundance of saprophytes at genus level in three fertilization regimes.

| CK                       |                        | HF                       |                        | WF                       |                        |
|--------------------------|------------------------|--------------------------|------------------------|--------------------------|------------------------|
| Fungi genus              | Relative abundance (%) | Fungi genus              | Relative abundance (%) | Fungi genus              | Relative abundance (%) |
| <i>Filobasidium</i>      | <b>1.336</b>           | <i>Neocosmospora</i>     | <b>0.743</b>           | <i>Neocosmospora</i>     | <b>0.624</b>           |
| <i>Coprinopsis</i>       | <b>1.116</b>           | <i>Filobasidium</i>      | 0.551                  | <i>Filobasidium</i>      | 0.515                  |
| <i>Neocosmospora</i>     | 0.794                  | <i>Trichocladium</i>     | 0.356                  | <i>Trichocladium</i>     | 0.296                  |
| <i>Trichocladium</i>     | 0.353                  | <i>Monocillium</i>       | 0.176                  | <i>Monocillium</i>       | 0.206                  |
| <i>Monocillium</i>       | 0.306                  | <i>Tetracladium</i>      | 0.169                  | <i>Acrocalymma</i>       | 0.187                  |
| <i>Cystofilobasidium</i> | 0.294                  | <i>Cystofilobasidium</i> | 0.152                  | <i>Keissleriella</i>     | 0.178                  |
| <i>Coprinellus</i>       | 0.163                  | <i>Acrocalymma</i>       | 0.140                  | <i>Talaromyces</i>       | 0.152                  |
| <i>Preussia</i>          | 0.105                  | <i>Talaromyces</i>       | 0.122                  | <i>Cystofilobasidium</i> | 0.104                  |

Note: The relative abundances of saprophytes are shown ( $\geq 0.1\%$ ). CK, no fertilization; HF, hole fertilization; WF, integration of water and fertilizer.

**Table S10.** Relative abundance of decomposing bacteria at genus level in three fertilization regimes.

| CK                  |                        | HF                  |                        | WF                  |                        |
|---------------------|------------------------|---------------------|------------------------|---------------------|------------------------|
| Bacteria genus      | Relative abundance (%) | Bacteria genus      | Relative abundance (%) | Bacteria genus      | Relative abundance (%) |
| <i>Arthrobacter</i> | <b>8.063</b>           | <i>Arthrobacter</i> | <b>6.152</b>           | <i>Arthrobacter</i> | <b>5.871</b>           |



|                      |       |                      |       |                      |       |
|----------------------|-------|----------------------|-------|----------------------|-------|
| <i>Pseudomonas</i>   | 2.913 | <i>Lactobacillus</i> | 3.435 | <i>Lactobacillus</i> | 1.905 |
| <i>Lactobacillus</i> | 1.249 | <i>Pseudomonas</i>   | 1.140 | <i>Pseudomonas</i>   | 1.285 |
| <i>Massilia</i>      | 1.139 |                      |       | <i>Bacillus</i>      | 1.230 |
| <i>Bacillus</i>      | 1.112 |                      |       |                      |       |
| <i>Shinella</i>      | 1.098 |                      |       |                      |       |

---

Note: Relative abundance values  $\geq 1\%$  are shown. CK, no fertilization; HF, hole fertilization; WF, integration of water and fertilizer.
